# Supplementary material
Source: MDPI journal article supplement (https://www.mdpi.com/2073-4395/10/12/2010)
Supplement: s1 [file s1]

## Supplementary Tables

**Table S1.** Significance levels for treatment (soil group and selected soil texture and tillage type) effects on the stability indices (VDP=volume of drainable pores, MS=modal suction, SI = structural index,  $\alpha$  and  $n$ , model parameters representing the location of the inflection point and the steepness of the water retention curve respectively). NS, not significant; \*, \*\*, \*\*\*Significant at the 0.05, 0.01 and 0.001 level.

| Source                                      | df | VDP | MS  | SI  | $\alpha$ | $n$ |
|---------------------------------------------|----|-----|-----|-----|----------|-----|
| Soil group (30 samples in 3 texture groups) | 3  | *** | *** | *** | ***      | *** |
| Soil texture (3 selected soils by texture)  | 3  | *** | **  | *** | **       | *** |
| Tillage (NT-grass and CT-crop)              | 2  | **  | **  | *** | **       | *** |
| Soil x Tillage                              | 6  | **  | *   | *   | *        | **  |

**Table S2.** Significance levels for treatment (soil texture and PAM rate) effects on the stability indices (VDP=volume of drainable pores, MS=modal suction, SI = structural index,  $\alpha$  and  $n$ , model parameters which represent the location of the inflection point and the steepness of the water retention curve respectively). \*, \*\*, \*\*\*Significant at the 0.05, 0.01 and 0.001 level.

| Source          | df | VDP | MS  | SI  | $\alpha$ | $n$ |
|-----------------|----|-----|-----|-----|----------|-----|
| Soil (texture)  | 2  | *** | *** | *** | ***      | *** |
| PAM rate        | 6  | *** | *** | *** | ***      | *** |
| Soil x PAM rate | 12 | *** | **  | *** | **       | *   |
